# Supplementary material for: Intramolecular hypervalent CO⋯S interactions in a series of 1,3-benzothiazole derivatives
Source: Royal Society of Chemistry journal article supplement (doi:10.1039/c1ce06106b), 2011-11-24
Supplement: c1ce06106b.pdf [file c1ce06106b.pdf]

Electronic Supplementary Information (ESI)

## Intramolecular hypervalent C=O...S interactions in a series of 1,3-benzothiazole derivatives

Gabriel Navarrete-Vázquez,<sup>a\*</sup> Alfredo Alaniz-Palacios<sup>a</sup>, Margarita Tlahuextl,<sup>b</sup> Margarita Bernal-Uruchurtu and Hugo Tlahuext<sup>c\*</sup>

<sup>a</sup>Facultad de Farmacia, Universidad Autónoma del Estado de Morelos, Av. Universidad 1001, Col. Chamilpa, C.P. 62209, Cuernavaca, Morelos, México. E-Mail:

gabriel\_navarrete@uaem.mx

<sup>b</sup>Centro de Investigaciones Químicas, Universidad Autónoma del Estado de Hidalgo, Carretera Pachuca-Tulancingo Km 4.5 U. Universitaria. C. P. 48124 Mineral de la Reforma, Hidalgo, México

<sup>c</sup>Centro de Investigaciones Químicas, Universidad Autónoma del Estado de Morelos, Av. Universidad 1001, Col. Chamilpa, C.P. 62209, Cuernavaca, Morelos, México. E-Mail: tlahuext@ciq.uaem.mx

Additional figures for compounds **1-7**. Asymmetric units of compounds **1-7**, showing the atom-labelling schemes. Displacement ellipsoids are drawn at the 50% probability level and H atoms are shown as small spheres of arbitrary radii.

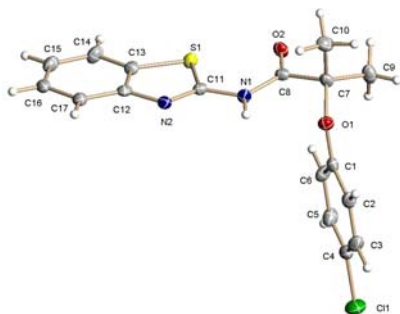

Compound 1

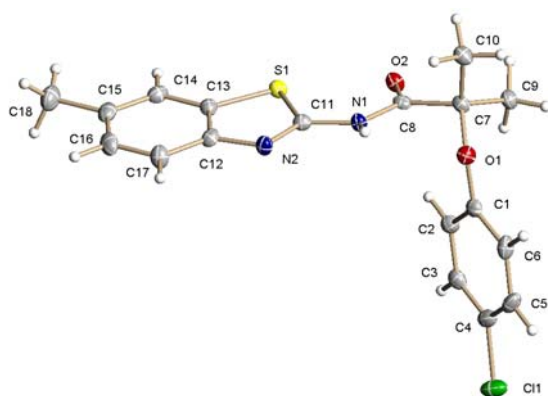

Compound 2

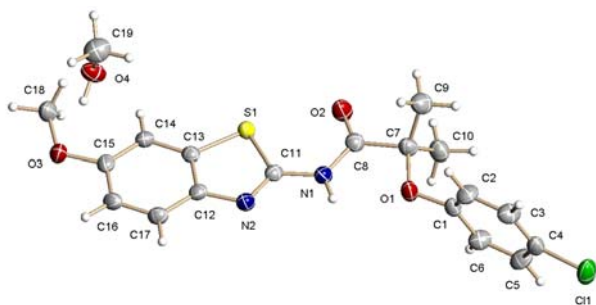

Compound 3

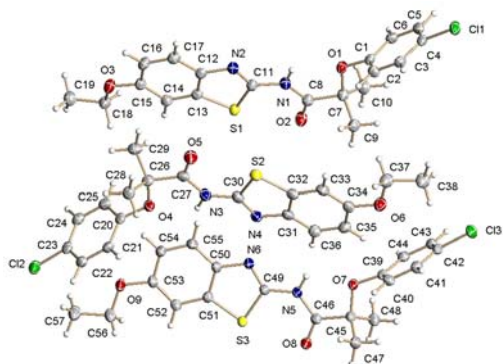

Compound 4

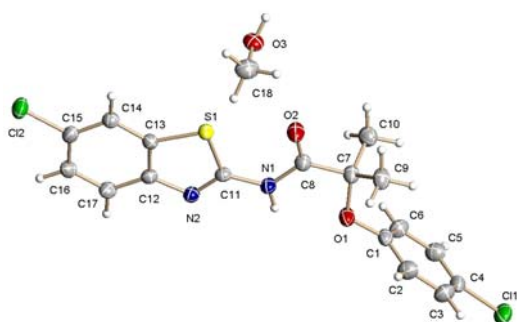

Compound 5

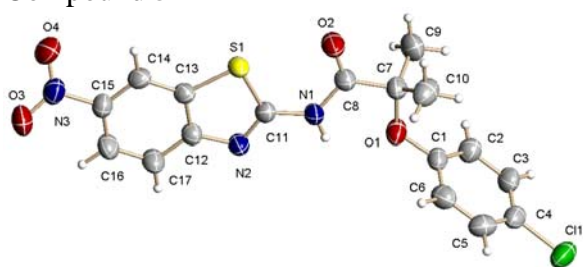

Compound 6

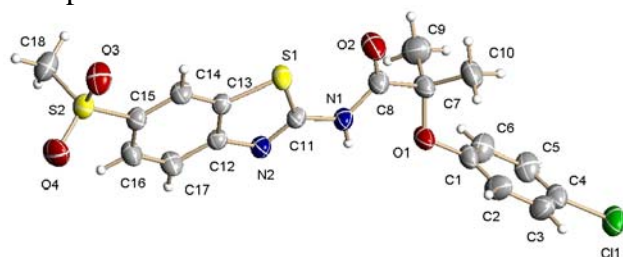

Compound 7
